# Supplementary material
Source: PubMed Central journal article supplement (PMC6583098)
Supplement: jamacardiol-3-1212-s001.pdf [file jamacardiol-3-1212-s001.pdf]

## Supplementary Online Content

Capoulade R, Yeang C, Chan KL, Pibarot P, Tsimikas S. Association of mild to moderate aortic valve stenosis progression with higher lipoprotein(a) and oxidized phospholipid levels: secondary analysis of a randomized clinical trial. *JAMA Cardiol.* Published online November 21, 2018.  
doi:10.1001/jamacardio.2018.3798

**eMethods.** Data Collection

**eTable.** Linear Association of Logarithmic-Transformed Lp(a), OxPL-apoB, and OxPL-apo(a) Plasma Levels With CAVS Progression Rate

**eAppendix.** Investigators and Sites of the ASTRONOMER Trial

This supplementary material has been provided by the authors to give readers additional information about their work.

## **eMethods. Data Collection**

### **Clinical data**

Clinical data included age, gender, height, weight, waist circumference, body surface area (BSA), body mass index (BMI), systolic and diastolic blood pressures, hypertension (patients receiving antihypertensive medications or having known but untreated hypertension [blood pressure  $\geq$  140/90 mm Hg]), history of smoking and randomization status (i.e. statin vs placebo). The clinical identification of patients with the features of the metabolic syndrome (MetS) was based on the modified criteria proposed by the National Cholesterol Education Program – Adult Treatment Panel III (1).

### **Doppler echocardiographic data**

Randomly selected studies that contributed 10% of the total number of echocardiograms were reviewed to ensure that the studies and measurements were performed in accordance with the protocol.

*Aortic valve morphology and function:* The aortic valve (AV) phenotype (i.e. bicuspid vs. tricuspid) was recorded. The Doppler echocardiographic indices of CAVS severity included peak aortic jet velocity ( $V_{\text{peak}}$ ), peak and mean transvalvular pressure gradients, and the aortic valve area (AVA) calculated by the standard continuity equation. The degree of AV calcification was scored according to the criteria proposed by Rosenhek et al (2).

*Left ventricular geometry and function:* LV ejection fraction (LVEF) was measured with the use of biplane Simpson method. As a measure of global LV hemodynamic load,

we calculated the valvulo-arterial impedance (5):  $Z_{va}=(SBP+\Delta P_{mean})/SV_i$  where SBP is the systolic blood pressure,  $\Delta P_{mean}$  the mean transvalvular gradient, and  $SV_i$  is the stroke volume indexed to a 2.04 power of height (4).

### **Laboratory data**

The plasma levels of glucose, creatinine, total cholesterol, low-density lipoprotein cholesterol (LDL-C), high-density lipoprotein cholesterol (HDL-C), triglycerides, and apolipoprotein B (apoB) were measured in fasting plasma samples using standardized techniques. LDL-C was corrected for the cholesterol content in Lp(a) using the following formula: corrected LDL-C = LDL-C – Lp(a) mass in mg/dl  $\times$  0.3.<sup>1,2</sup>

Using frozen plasma sample stored at -80°C, levels of OxPL-apoB-100, OxPL-apo(a) were measured with chemiluminescent ELISAs, as previously described in a subset of 220 patients from the ASTRONOMER trial (82% of the cohort).<sup>3</sup> Lp(a) was measured with a validated ELISA as previously described.<sup>4,5</sup>

**eTable.** Linear Association of Logarithmic-Transformed Lp(a), OxPL-apoB and OxPL-apo(a) Plasma Levels With CAVS Progression Rate

|                                                                                              | <b>Overall Group (n=220)</b> |            |                            |            | <b>Patients ≤ 57 years (n=108)</b> |            |                            |            |
|----------------------------------------------------------------------------------------------|------------------------------|------------|----------------------------|------------|------------------------------------|------------|----------------------------|------------|
| <b>PROGRESSION RATE OF AS (I.E. ANNUALIZED <math>V_{PEAK}</math>)</b>                        |                              |            |                            |            |                                    |            |                            |            |
|                                                                                              | Univariable                  |            | Multivariable <sup>#</sup> |            | Univariable                        |            | Multivariable <sup>§</sup> |            |
|                                                                                              | $\beta$ Coefficient<br>±SE   | P<br>Value | $\beta$ Coefficient<br>±SE | P<br>Value | $\beta$ Coefficient<br>±SE         | P<br>Value | $\beta$ Coefficient<br>±SE | P<br>Value |
| Log Lp(a)                                                                                    | 0.12 ±0.02                   | .07        | 0.20 ±0.02                 | .02        | 0.25 ±0.02                         | .008       | 0.31 ±0.03                 | .01        |
| Log OxPL-apoB                                                                                | 0.15 ±0.02                   | .03        | 0.18 ±0.02                 | .03        | 0.27 ±0.03                         | .005       | 0.38 ±0.04                 | .002       |
| Log OxPL-apo(a)                                                                              | 0.11 ±0.01                   | .09        | 0.17 ±0.01                 | .04        | 0.24 ±0.02                         | .01        | 0.31 ±0.02                 | .01        |
|                                                                                              |                              |            |                            |            |                                    |            |                            |            |
| <b>RISK OF RAPID AS PROGRESSION (I.E. ANNUALIZED <math>V_{PEAK} &gt; 0.20</math> M/S/YR)</b> |                              |            |                            |            |                                    |            |                            |            |
|                                                                                              | Univariable                  |            | Multivariable <sup>†</sup> |            | Univariable                        |            | Multivariable <sup>‡</sup> |            |
|                                                                                              | OR (95% CI)                  | P<br>Value | OR (95% CI)                | P<br>Value | OR (95% CI)                        | P<br>Value | OR (95% CI)                | P<br>Value |
| Log Lp(a)                                                                                    | 1.31 (1.00-1.72)             | .047       | 1.39 (1.02-1.88)           | .04        | 1.97 (1.27-3.08)                   | .003       | 2.53 (1.39-4.61)           | .002       |
| Log OxPL-apoB                                                                                | 1.35 (0.97-1.88)             | .08        | 1.54 (1.06-2.24)           | .03        | 1.98 (1.18-3.32)                   | .009       | 2.80 (1.39-5.65)           | .004       |
| Log OxPL-apo(a)                                                                              | 1.21 (0.99-1.49)             | .06        | 1.26 (1.00-1.59)           | .046       | 1.67 (1.20-2.34)                   | .003       | 2.05 (1.29-3.25)           | .002       |
|                                                                                              |                              |            |                            |            |                                    |            |                            |            |

CAVS: calcific aortic valve stenosis; Log: logarithmic transformation; Lp(a): lipoprotein(a); OxPL: oxidized phospholipids; apoB: apolipoprotein B; apo(a): apolipoprotein (a); CAVS progression rate is defined by the annualized progression of peak aortic jet velocity;  $\beta$  coeff. is the standardized raw-score regression coefficient ±SE from the linear regression

analysis of the progression rate of AS (i.e. annualized V<sub>peak</sub>); OR is odds ratio with 95% confidence interval from the logistic regression analysis of the rapid progression rate of AS (i.e. annualized V<sub>peak</sub> >0.20 m/s/yr). Each multivariable model includes one metabolic variable and is adjusted for confounding variables as previously published. #: model adjusted for age, gender, hypertension, smoking history, metabolic syndrome, systolic blood pressure, statin use, corrected LDL-C, apoB, creatinine, bicuspid aortic valve phenotype, aortic valve calcification score, baseline peak aortic jet velocity, and valvulo-arterial impedance. §: model adjusted for the same variables as model #, except that age and smoking history were not included. ¶: model adjusted for age, gender, hypertension, metabolic syndrome, statin use, corrected LDL-C, creatinine, bicuspid aortic valve phenotype, aortic valve calcification score, and baseline peak aortic jet velocity. ‡: model adjusted for the same variables as model ¶, except for age.

## **eAppendix. Investigators and Sites of the ASTRONOMER Trial**

Kwan Leung Chan, Ian Burwash, University of Ottawa Heart Institute (Ottawa, ON)

Susan Fagan, Bruce Sussex, HSC-General Hospital (St. John's, NFLD)

Chris Koilpillai, Bruce Josephson, QEII HSC (Halifax, NS)

Jean G. Dumesnil, Philippe Pibarot, Quebec Heart Institute (Laval, QC)

George Honos, Jewish General Hospital (Montreal, QC)

Jean-Claude Tardif, Montreal Heart Institute (Montreal, QC)

Michele Turek, The Ottawa Hospital – General Campus (Ottawa, ON)

Trevor Robinson, Chi-Ming Chow, St. Michael's Hospital (Toronto, ON)

Sam Siu, Eric Yu; Toronto General Hospital (Toronto, ON)

Cam Joyner, Chris Morgan, Sunnybrook HSC (Toronto, ON)

Charles Tomlinson, Koon Teo, Hamilton HSC (Hamilton, ON)

James Tam, David Mymin, Nasir Shaikh, Davinder Jassal, HSC Winnipeg (Winnipeg)

Bibiana Cujec, University of Alberta Hospital (Edmonton, AB)

Peter Giannoccaro, Brian Connelly, Peter Lougheed Centre (Calgary, AB)

Kenneth O'Reilly, William Hui, Ted Fenske, Alan Jones, Randy Williams (Royal Alexander Hospital (Edmonton, AB)

John Jue, Ken Gin, Pui-Kee Lee, Vancouver General Hospital (Vancouver, BC)

Randall Sochowski, Dennis Morgan, Mangeet Mann, Ken Yvorchuk, Victoria Heart Institute (Victoria, BC)

Stephen Pearce, S. Cheung, Raymond Dong, J.M. Kornder, Dante Manyari, Salima Shariff, Surrey Memorial Hospital (Surrey, BC)

Stuart Smith, Clause Rinne, Westheights Cardiology Clinic (Kitchener, ON)

Thao Huynh, Montreal General Hospital (Montreal, QC)

Milan Gupta, David Borts, Anil Gupta, Nickie Bonafede, Brampton Research Associates (Brampton, ON)

Shekhar Pandey, Cambridge Cardiac Care Centre (Cambridge, ON)

## References

1. Seman LJ, Breckenridge WC. Isolation and partial characterization of apolipoprotein (a) from human lipoprotein (a). *Biochem Cell Biol.* 1986;64(10):999-1009.
2. Tsimikas S, Viney NJ, Hughes SG, et al. Antisense therapy targeting apolipoprotein(a): a randomised, double-blind, placebo-controlled phase 1 study. *Lancet.* 2015;386(10002):1472-1483.
3. Capoulade R, Chan KL, Yeang C, et al. Oxidized Phospholipids, Lipoprotein(a), and Progression of Calcific Aortic Valve Stenosis. *J Am Coll Cardiol.* 2015;66(11):1236-1246.
4. Tsimikas S, Lau HK, Han KR, et al. Percutaneous coronary intervention results in acute increases in oxidized phospholipids and lipoprotein(a): short-term and long-term immunologic responses to oxidized low-density lipoprotein. *Circulation.* 2004;109(25):3164-3170.
5. Verbeek R, Boekholdt SM, Stoekenbroek RM, et al. Population and assay thresholds for the predictive value of lipoprotein (a) for coronary artery disease: the EPIC-Norfolk Prospective Population Study. *J Lipid Res.* 2016;57(4):697-705.
6. Seman LJ, Breckenridge WC. Isolation and partial characterization of apolipoprotein (a) from human lipoprotein (a). *BiochemCell Biol.* 1986;64(10):999-1009.
